# Supplementary material for: Preoperative Prediction of Lymphovascular Space Invasion in Cervical Cancer With Radiomics –Based Nomogram
Source: Front Oncol. 2021 Jul 12;11:637794. doi: 10.3389/fonc.2021.637794 (PMC8311659; doi:10.3389/fonc.2021.637794)
Supplement: Supplementary file 1 [file DataSheet_1.csv]

num	train_auc	train_acc	train_sen	train_spe	test_auc	test_acc	test_sen	test_spe
2	0.84368071	0.75	0.56097561	0.890909091	0.6875	0.717391304	0.525423729	0.860759494
3	0.850997783	0.75	0.585365854	0.872727273	0.668981481	0.710144928	0.542372881	0.835443038
4	0.841685144	0.8125	0.756097561	0.854545455	0.719907407	0.768115942	0.694915254	0.82278481
5	0.909090909	0.822916667	0.756097561	0.872727273	0.703703704	0.775362319	0.711864407	0.82278481
6	0.901108647	0.822916667	0.756097561	0.872727273	0.715277778	0.775362319	0.694915254	0.835443038
7	0.894013304	0.822916667	0.780487805	0.854545455	0.733796296	0.768115942	0.711864407	0.810126582
8	0.907317073	0.854166667	0.804878049	0.890909091	0.752314815	0.804347826	0.728813559	0.860759494
9	0.913525499	0.84375	0.804878049	0.872727273	0.789351852	0.804347826	0.745762712	0.848101266
10	0.927272727	0.864583333	0.853658537	0.872727273	0.770833333	0.804347826	0.762711864	0.835443038
11	0.944567627	0.875	0.853658537	0.890909091	0.81712963	0.81884058	0.779661017	0.848101266
12	0.944124169	0.864583333	0.853658537	0.872727273	0.840277778	0.81884058	0.796610169	0.835443038
13	0.938359202	0.854166667	0.829268293	0.872727273	0.863425926	0.833333333	0.796610169	0.860759494
14	0.959201774	0.864583333	0.804878049	0.909090909	0.930046296	0.855072464	0.830508475	0.873417722
15	0.950776053	0.885416667	0.829268293	0.927272727	0.905092593	0.876811594	0.830508475	0.911392405
16	0.953436807	0.885416667	0.829268293	0.927272727	0.908564815	0.869565217	0.830508475	0.898734177
17	0.951662971	0.885416667	0.829268293	0.927272727	0.884259259	0.847826087	0.813559322	0.873417722
18	0.966297118	0.895833333	0.829268293	0.945454545	0.893518519	0.884057971	0.847457627	0.911392405
19	0.964966741	0.885416667	0.804878049	0.945454545	0.895833333	0.876811594	0.830508475	0.911392405
20	0.964966741	0.895833333	0.829268293	0.945454545	0.900462963	0.876811594	0.847457627	0.898734177
21	0.967184035	0.895833333	0.829268293	0.945454545	0.900462963	0.884057971	0.813559322	0.936708861
22	0.972062084	0.90625	0.87804878	0.927272727	0.861111111	0.876811594	0.847457627	0.898734177
23	0.972505543	0.90625	0.87804878	0.927272727	0.844907407	0.876811594	0.847457627	0.898734177
